# Supplementary material for: Autogenous growth of the hierarchical V-doped NiFe layer double metal hydroxide electrodes for an enhanced overall water splitting
Source: Royal Society of Chemistry journal article supplement (doi:10.1039/d0dt01520b), 2020-01-01
Supplement: d0dt01520b1.pdf [file d0dt01520b1.pdf]

## Supporting Information

### Autogenous Growth of Hierarchical V-doped NiFe Layer Double Hydroxides Electrode for Enhanced Overall Water Splitting

Jin Liang<sup>a</sup>, Haiqi Shen<sup>a</sup>, Yaming Ma<sup>b</sup>, Dongyu Liu<sup>d</sup>, Mingtao Li<sup>d</sup>, Jie Kong<sup>a</sup>, Yusheng Tang<sup>a</sup>,  
Shujiang Ding<sup>bc</sup>

<sup>a</sup>MOE Key Laboratory of Space Applied Physics and Chemistry, Shaanxi Key Laboratory of Macromolecular Science and Technology, School of Chemistry and Chemical Engineering, Northwestern Polytechnical University, Xi'an, 710072, P. R. China. [jin.liang@nwpu.edu.cn](mailto:jin.liang@nwpu.edu.cn);

<sup>b</sup>Xi'an Key Laboratory of Sustainable Energy Materials Chemistry, Department of Applied Chemistry, School of Science, Xi'an Jiaotong University, Xi'an, 710049, P. R. China.

<sup>c</sup>Shenzhen Academy, Xi'an Jiaotong University, Shenzhen, 518057, P. R. China.

<sup>d</sup>International Research Center for Renewable Energy, State Key Laboratory of Multiphase Flow in Power Engineering, Xi'an Jiaotong University, Xi'an, 710049, China

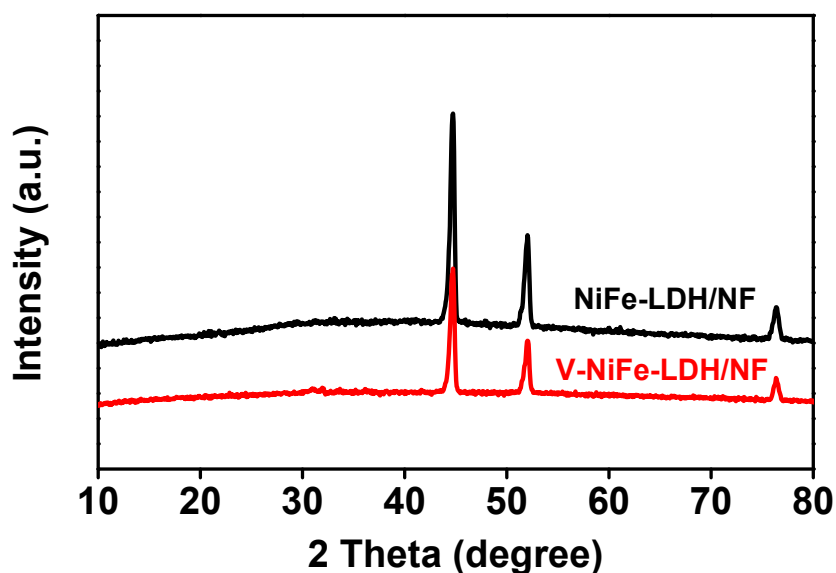

**Figure S1.** XRD patterns of V-NiFe-LDH/NF and NiFe-LDH/NF.

**Table S1.** Table of electrochemical performance of LDH-based electrodes

| Electrocatalysts                                                    | Overpotential (mV) at 10 mA cm <sup>-2</sup> | Tafel slope (mV dec <sup>-1</sup> ) | Electrolyte | Reference                                     |
|---------------------------------------------------------------------|----------------------------------------------|-------------------------------------|-------------|-----------------------------------------------|
| V-NiFe-LDH/NF                                                       | 195                                          | 31.3                                | 1M KOH      | This work                                     |
| NiFe LDH/(NiFe)S <sub>x</sub>                                       | 210                                          | 105                                 | 1M KOH      | Electrochim. Acta, 2020, 348, 136339          |
| (Ni <sub>0.7</sub> Fe <sub>0.3</sub> )C <sub>2</sub> O <sub>4</sub> | 203                                          | 43                                  | 1M KOH      | Small, 2019, 15, 1904579                      |
| NP Au/Cr-NiFe                                                       | 323                                          | 33                                  | 0.1 M KOH   | J. Mater. Chem. A, 2019, 7, 9690              |
| (Co,Ni)Se <sub>2</sub> @NiFe LDH                                    | 277                                          | 75                                  | 1M KOH      | ACS Appl. Mater. Interfaces 2019, 11, 8106    |
| NiFe LDH/NF                                                         | 219                                          | 33                                  | 1M KOH      | J. Mater. Chem. A, 2019, 7, 22889             |
| Hcp-NiFe@NC                                                         | 226                                          | 41                                  | 1M KOH      | Angew. Chem. 10.1002/ange.201902446           |
| NiFe-OH NS/NF-7                                                     | ~210                                         | 46.7                                | 1M KOH      | Appl. Catal. B: Environmental, 2019, 244, 844 |

|              |     |    |        |                                             |
|--------------|-----|----|--------|---------------------------------------------|
| GDY@NiFe     | 260 | 95 | 1M KOH | ACS Appl. Mater. Interfaces, 2019, 11, 2662 |
| NiO@NiFe-LDH | 256 | 72 | 1M KOH | ACS Sustainable Chem. Eng. 2019, 7, 2327    |

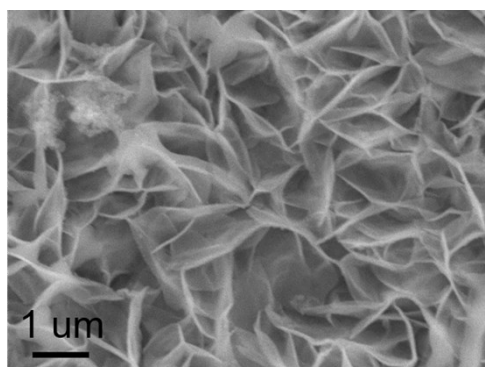

**Figure S2.** Postmortem check of tested V-NiFe-LDH/NF.

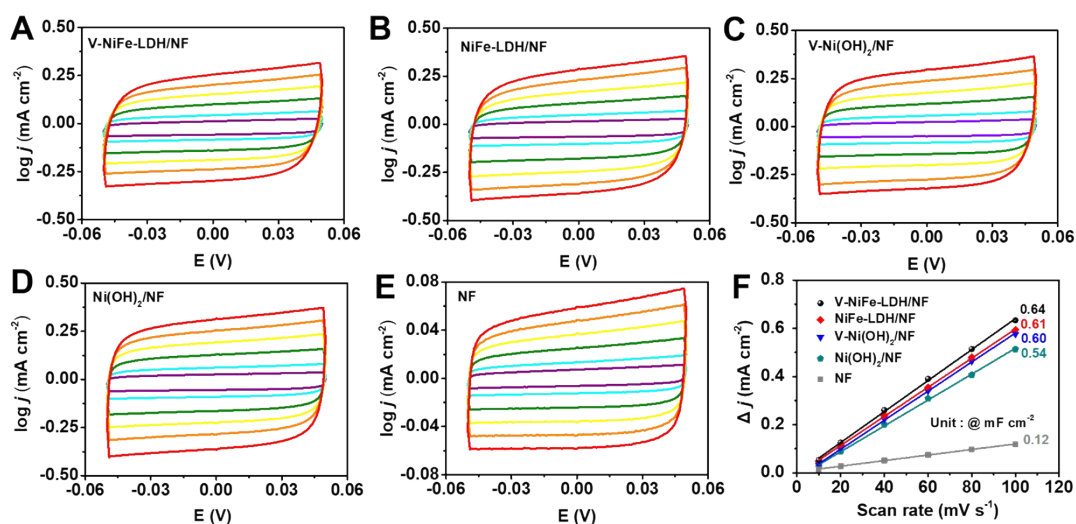

**Figure S3.** The ECSA was estimated based on  $C_{dl}$  to insight the excellent catalytic activity for both OER and HER.

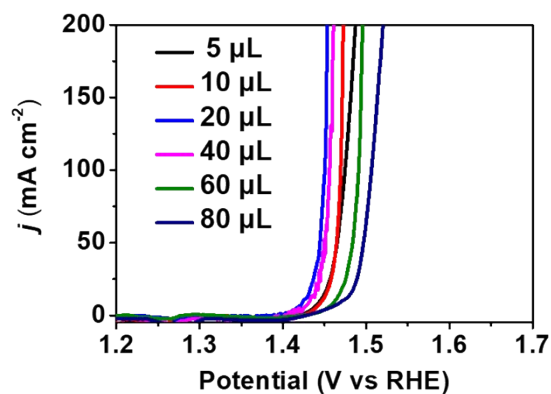

**Figure S4.** The series LSV curves of V-NiFe-LDH/NF.
